# Supplementary material for: Complications and outcomes of hospitalizations for patients with and without Parkinson disease
Source: Frontiers journal article supplement (doi:10.3389/fnagi.2023.1276731), 2023-12-15
Supplement: Data_Sheet_1.PDF [file Data_Sheet_1.PDF]

**Table S1.** Identification of Potentially Preventable Complications

| Potentially Preventable Complications <sup>a</sup> | ICD-10 Code | Description                                                                                | Exclusions <sup>b</sup>                           |
|----------------------------------------------------|-------------|--------------------------------------------------------------------------------------------|---------------------------------------------------|
| Delirium                                           | F05         | Delirium due to known physiological condition                                              |                                                   |
|                                                    | R41.0       | Disorientation, unspecified                                                                |                                                   |
|                                                    | R41.82      | Altered Mental Status, unspecified                                                         |                                                   |
|                                                    | G92.8       | Other toxic encephalopathy                                                                 |                                                   |
|                                                    | G92.9       | Unspecified toxic encephalopathy                                                           |                                                   |
|                                                    | G93.40      | Encephalopathy, unspecified                                                                |                                                   |
|                                                    | G93.41      | Metabolic encephalopathy                                                                   |                                                   |
|                                                    | G93.49      | Other encephalopathy                                                                       |                                                   |
| Aspiration Pneumonia                               | J69.0       | Pneumonitis due to inhalation of food and vomit                                            | Principal Diagnosis of Pneumonia CCSR code RSP002 |
|                                                    | J69.1       | Pneumonitis due to inhalation of oils and essences                                         |                                                   |
|                                                    | J69.8       | Pneumonitis due to inhalation of other solids and liquids                                  |                                                   |
| Cardiac Arrest                                     | I46.2       | Cardiac arrest due to underlying cardiac condition                                         |                                                   |
|                                                    | I46.8       | Cardiac arrest due to other underlying condition                                           |                                                   |
|                                                    | I46.9       | Cardiac arrest, cause unspecified                                                          |                                                   |
|                                                    | I49.01      | Ventricular fibrillation                                                                   |                                                   |
|                                                    | I49.02      | Ventricular flutter                                                                        |                                                   |
|                                                    | 5A12012     | Performance of Cardiac Output, Single, Manual                                              |                                                   |
|                                                    | 5A1221J     | Performance of Cardiac Output, Continuous, Automated                                       |                                                   |
| <i>C. Difficile</i> Infection                      | A04.71      | Enterocolitis due to <i>Clostridium difficile</i> , recurrent                              |                                                   |
|                                                    | A04.72      | Enterocolitis due to <i>Clostridium difficile</i> , not specified as recurrent             |                                                   |
| Deep Venous Thrombosis                             | I80.10      | Phlebitis and thrombophlebitis of unspecified femoral vein                                 |                                                   |
|                                                    | I80.11      | Phlebitis and thrombophlebitis of right femoral vein                                       |                                                   |
|                                                    | I80.12      | Phlebitis and thrombophlebitis of left femoral vein                                        |                                                   |
|                                                    | I80.13      | Phlebitis and thrombophlebitis of femoral vein, bilateral                                  |                                                   |
|                                                    | I80.201     | Phlebitis and thrombophlebitis of unspecified deep vessels of right lower extremity        |                                                   |
|                                                    | I80.202     | Phlebitis and thrombophlebitis of unspecified deep vessels of left lower extremity         |                                                   |
|                                                    | I80.203     | Phlebitis and thrombophlebitis of unspecified deep vessels of lower extremities, bilateral |                                                   |
|                                                    | I80.209     | Phlebitis and thrombophlebitis of unspecified deep vessels of unspecified lower extremity  |                                                   |
|                                                    | I80.211     | Phlebitis and thrombophlebitis of right iliac vein                                         |                                                   |
|                                                    | I80.212     | Phlebitis and thrombophlebitis of left iliac vein                                          |                                                   |
|                                                    | I80.213     | Phlebitis and thrombophlebitis of iliac vein, bilateral                                    |                                                   |
|                                                    | I80.219     | Phlebitis and thrombophlebitis of unspecified iliac vein                                   |                                                   |
|                                                    | I80.221     | Phlebitis and thrombophlebitis of right popliteal vein                                     |                                                   |
|                                                    | I80.222     | Phlebitis and thrombophlebitis of left popliteal vein                                      |                                                   |
|                                                    | I80.223     | Phlebitis and thrombophlebitis of popliteal vein, bilateral                                |                                                   |
|                                                    | I80.229     | Phlebitis and thrombophlebitis of unspecified popliteal vein                               |                                                   |
|                                                    | I80.291     | Phlebitis and thrombophlebitis of other deep vessels of right lower extremity              |                                                   |
|                                                    | I80.292     | Phlebitis and thrombophlebitis of other deep vessels of left lower extremity               |                                                   |
|                                                    | I80.293     | Phlebitis and thrombophlebitis of other deep vessels of lower extremity, bilateral         |                                                   |
|                                                    | I80.299     | Phlebitis and thrombophlebitis of other deep vessels of unspecified lower extremity        |                                                   |
|                                                    | I80.3       | Phlebitis and thrombophlebitis of lower extremities, unspecified                           |                                                   |
|                                                    | I80.9       | Phlebitis and thrombophlebitis of unspecified site                                         |                                                   |
|                                                    | I82.401     | Acute embolism and thrombosis of unspecified deep veins of right lower extremity           |                                                   |

|       |                                |                                                                                                 |                                                                                                                    |
|-------|--------------------------------|-------------------------------------------------------------------------------------------------|--------------------------------------------------------------------------------------------------------------------|
|       | I82.402                        | Acute embolism and thrombosis of unspecified deep veins of left lower extremity                 |                                                                                                                    |
|       | I82.403                        | Acute embolism and thrombosis of unspecified deep veins of lower extremity, bilateral           |                                                                                                                    |
|       | I82.409                        | Acute embolism and thrombosis of unspecified deep veins of unspecified lower extremity          |                                                                                                                    |
|       | I82.411                        | Acute embolism and thrombosis of right femoral vein                                             |                                                                                                                    |
|       | I82.412                        | Acute embolism and thrombosis of left femoral vein                                              |                                                                                                                    |
|       | I82.413                        | Acute embolism and thrombosis of femoral vein, bilateral                                        |                                                                                                                    |
|       | I82.419                        | Acute embolism and thrombosis of unspecified femoral vein                                       |                                                                                                                    |
|       | I82.421                        | Acute embolism and thrombosis of right iliac vein                                               |                                                                                                                    |
|       | I82.422                        | Acute embolism and thrombosis of left iliac vein                                                |                                                                                                                    |
|       | I82.423                        | Acute embolism and thrombosis of iliac vein, bilateral                                          |                                                                                                                    |
|       | I82.429                        | Acute embolism and thrombosis of unspecified iliac vein                                         |                                                                                                                    |
|       | I82.431                        | Acute embolism and thrombosis of right popliteal vein                                           |                                                                                                                    |
|       | I82.432                        | Acute embolism and thrombosis of left popliteal vein                                            |                                                                                                                    |
|       | I82.433                        | Acute embolism and thrombosis of popliteal vein, bilateral                                      |                                                                                                                    |
|       | I82.439                        | Acute embolism and thrombosis of unspecified popliteal vein                                     |                                                                                                                    |
|       | I82.491                        | Acute embolism and thrombosis of other specified deep vein of right lower extremity             |                                                                                                                    |
|       | I82.492                        | Acute embolism and thrombosis of other specified deep vein of left lower extremity              |                                                                                                                    |
|       | I82.493                        | Acute embolism and thrombosis of other specified deep vein of lower extremity, bilateral        |                                                                                                                    |
|       | I82.499                        | Acute embolism and thrombosis of other specified deep vein of unspecified lower extremity       |                                                                                                                    |
|       | I82.4Y1                        | Acute embolism and thrombosis of unspecified deep veins of right proximal lower extremity       |                                                                                                                    |
|       | I82.4Y2                        | Acute embolism and thrombosis of unspecified deep veins of left proximal lower extremity        |                                                                                                                    |
|       | I82.4Y3                        | Acute embolism and thrombosis of unspecified deep veins of proximal lower extremity, bilateral  |                                                                                                                    |
|       | I82.4Y9                        | Acute embolism and thrombosis of unspecified deep veins of unspecified proximal lower extremity |                                                                                                                    |
|       | T81.72xA                       | Complication of vein following a procedure, not elsewhere classified, initial encounter         |                                                                                                                    |
| Falls | W[01][0123456789] <sup>c</sup> | Slipping, tripping, stumbling and falls                                                         | Absence of comorbid diagnoses ICD-10-CM code Y92.23 "Hospital as place of occurrence for external cause of injury" |
| Ileus | K91.3                          | Postprocedural intestinal obstruction                                                           |                                                                                                                    |
|       | K56                            | Paralytic ileus and intestinal obstruction without hernia                                       |                                                                                                                    |
|       | K59.81                         | Ogilvie syndrome                                                                                |                                                                                                                    |
|       | K59.00                         | Constipation unspecified                                                                        |                                                                                                                    |
|       | K59.01                         | Slow transit constipation                                                                       |                                                                                                                    |
|       | K59.02                         | Outlet dysfunction constipation                                                                 |                                                                                                                    |
|       | K59.03                         | Drug induced constipation                                                                       |                                                                                                                    |
|       | K59.09                         | Other constipation                                                                              |                                                                                                                    |

|                         |         |                                                                    |                                             |
|-------------------------|---------|--------------------------------------------------------------------|---------------------------------------------|
| Pulmonary Embolism      | I26.01  | Septic pulmonary embolism with acute cor pulmonale                 |                                             |
|                         | I26.02  | Saddle embolus of pulmonary artery with acute cor pulmonale        |                                             |
|                         | I26.09  | Other pulmonary embolism with acute cor pulmonale                  |                                             |
|                         | I26.90  | Septic pulmonary embolism without acute cor pulmonale              |                                             |
|                         | I26.92  | Saddle embolus of pulmonary artery without acute cor pulmonale     |                                             |
|                         | I26.93  | Single subsegmental pulmonary embolism without acute cor pulmonale |                                             |
|                         | I26.94  | Multiple subsegmental pulmonary emboli without acute cor pulmonale |                                             |
|                         | I26.99  | Other pulmonary embolism without acute cor pulmonale               |                                             |
| Urinary Tract Infection | N30.00  | Acute cystitis without hematuria                                   | Principal Diagnosis of UTI CCSR code GEN004 |
|                         | N30.01  | Acute cystitis with hematuria                                      |                                             |
|                         | N30.80  | Other cystitis without hematuria                                   |                                             |
|                         | N30.90  | Cystitis, unspecified without hematuria                            |                                             |
|                         | N30.91  | Cystitis, unspecified with hematuria                               |                                             |
|                         | N39.0   | Urinary tract infection, site not specified                        |                                             |
|                         | N41.3   | Prostatocystitis                                                   |                                             |
| Decubitus Ulcer         | L89.000 | Pressure ulcer of unspecified elbow, unstageable                   | Length of Stay ≤4 days                      |
|                         | L89.003 | Pressure ulcer of unspecified elbow, stage 3                       |                                             |
|                         | L89.004 | Pressure ulcer of unspecified elbow, stage 4                       |                                             |
|                         | L89.006 | Pressure-induced deep tissue damage of unspecified elbow           |                                             |
|                         | L89.010 | Pressure ulcer of right elbow, unstageable                         |                                             |
|                         | L89.013 | Pressure ulcer of right elbow, stage 3                             |                                             |
|                         | L89.014 | Pressure ulcer of right elbow, stage 4                             |                                             |
|                         | L89.016 | Pressure-induced deep tissue damage of right elbow                 |                                             |
|                         | L89.020 | Pressure ulcer of left elbow, unstageable                          |                                             |
|                         | L89.023 | Pressure ulcer of left elbow, stage 3                              |                                             |
|                         | L89.024 | Pressure ulcer of left elbow, stage 4                              |                                             |
|                         | L89.026 | Pressure-induced deep tissue damage of left elbow                  |                                             |
|                         | L89.100 | Pressure ulcer of unspecified part of back, unstageable            |                                             |
|                         | L89.103 | Pressure ulcer of unspecified part of back, stage 3                |                                             |
|                         | L89.104 | Pressure ulcer of unspecified part of back, stage 4                |                                             |
|                         | L89.106 | Pressure-induced deep tissue damage of unspecified part of back    |                                             |
|                         | L89.110 | Pressure ulcer of right upper back, unstageable                    |                                             |
|                         | L89.113 | Pressure ulcer of right upper back, stage 3                        |                                             |
|                         | L89.114 | Pressure ulcer of right upper back, stage 4                        |                                             |
|                         | L89.116 | Pressure-induced deep tissue damage of right upper back            |                                             |
|                         | L89.120 | Pressure ulcer of left upper back, unstageable                     |                                             |
|                         | L89.123 | Pressure ulcer of left upper back, stage 3                         |                                             |
|                         | L89.124 | Pressure ulcer of left upper back, stage 4                         |                                             |
|                         | L89.126 | Pressure-induced deep tissue damage of left upper back             |                                             |
|                         | L89.130 | Pressure ulcer of right lower back, unstageable                    |                                             |
|                         | L89.133 | Pressure ulcer of right lower back, stage 3                        |                                             |
|                         | L89.134 | Pressure ulcer of right lower back, stage 4                        |                                             |
|                         | L89.136 | Pressure-induced deep tissue damage of right lower back            |                                             |
|                         | L89.140 | Pressure ulcer of left lower back, unstageable                     |                                             |
|                         | L89.143 | Pressure ulcer of left lower back, stage 3                         |                                             |
|                         | L89.144 | Pressure ulcer of left lower back, stage 4                         |                                             |
|                         | L89.146 | Pressure-induced deep tissue damage of left lower back             |                                             |
|                         | L89.150 | Pressure ulcer of sacral region, unstageable                       |                                             |
|                         | L89.153 | Pressure ulcer of sacral region, stage 3                           |                                             |
|                         | L89.154 | Pressure ulcer of sacral region, stage 4                           |                                             |
|                         | L89.156 | Pressure-induced deep tissue damage of sacral region               |                                             |
|                         | L89.200 | Pressure ulcer of unspecified hip, unstageable                     |                                             |
|                         | L89.203 | Pressure ulcer of unspecified hip, stage 3                         |                                             |
|                         | L89.204 | Pressure ulcer of unspecified hip, stage 4                         |                                             |
|                         | L89.206 | Pressure-induced deep tissue damage of unspecified hip             |                                             |

|         |                                                                                 |
|---------|---------------------------------------------------------------------------------|
| L89.210 | Pressure ulcer of right hip, unstageable                                        |
| L89.213 | Pressure ulcer of right hip, stage 3                                            |
| L89.214 | Pressure ulcer of right hip, stage 4                                            |
| L89.216 | Pressure-induced deep tissue damage of right hip                                |
| L89.220 | Pressure ulcer of left hip, unstageable                                         |
| L89.223 | Pressure ulcer of left hip, stage 3                                             |
| L89.224 | Pressure ulcer of left hip, stage 4                                             |
| L89.226 | Pressure-induced deep tissue damage of left hip                                 |
| L89.300 | Pressure ulcer of unspecified buttock, unstageable                              |
| L89.303 | Pressure ulcer of unspecified buttock, stage 3                                  |
| L89.304 | Pressure ulcer of unspecified buttock, stage 4                                  |
| L89.306 | Pressure-induced deep tissue damage of unspecified buttock                      |
| L89.310 | Pressure ulcer of right buttock, unstageable                                    |
| L89.313 | Pressure ulcer of right buttock, stage 3                                        |
| L89.314 | Pressure ulcer of right buttock, stage 4                                        |
| L89.316 | Pressure-induced deep tissue damage of right buttock                            |
| L89.320 | Pressure ulcer of left buttock, unstageable                                     |
| L89.323 | Pressure ulcer of left buttock, stage 3                                         |
| L89.324 | Pressure ulcer of left buttock, stage 4                                         |
| L89.326 | Pressure-induced deep tissue damage of left buttock                             |
| L89.43  | Pressure ulcer of contiguous site of back, buttock and hip, stage 3             |
| L89.44  | Pressure ulcer of contiguous site of back, buttock and hip, stage 4             |
| L89.45  | Pressure ulcer of contiguous site of back, buttock and hip, unstageable         |
| L89.46  | Pressure-induced deep tissue damage of contiguous site of back, buttock and hip |
| L89.500 | Pressure ulcer of unspecified ankle, unstageable                                |
| L89.503 | Pressure ulcer of unspecified ankle, stage 3                                    |
| L89.504 | Pressure ulcer of unspecified ankle, stage 4                                    |
| L89.506 | Pressure-induced deep tissue damage of unspecified ankle                        |
| L89.510 | Pressure ulcer of right ankle, unstageable                                      |
| L89.513 | Pressure ulcer of right ankle, stage 3                                          |
| L89.514 | Pressure ulcer of right ankle, stage 4                                          |
| L89.516 | Pressure-induced deep tissue damage of right ankle                              |
| L89.520 | Pressure ulcer of left ankle, unstageable                                       |
| L89.523 | Pressure ulcer of left ankle, stage 3                                           |
| L89.524 | Pressure ulcer of left ankle, stage 4                                           |
| L89.526 | Pressure-induced deep tissue damage of left ankle                               |
| L89.600 | Pressure ulcer of unspecified heel, unstageable                                 |
| L89.603 | Pressure ulcer of unspecified heel, stage 3                                     |
| L89.604 | Pressure ulcer of unspecified heel, stage 4                                     |
| L89.606 | Pressure-induced deep tissue damage of unspecified heel                         |
| L89.610 | Pressure ulcer of right heel, unstageable                                       |
| L89.613 | Pressure ulcer of right heel, stage 3                                           |
| L89.614 | Pressure ulcer of right heel, stage 4                                           |
| L89.616 | Pressure-induced deep tissue damage of right heel                               |
| L89.620 | Pressure ulcer of left heel, unstageable                                        |
| L89.623 | Pressure ulcer of left heel, stage 3                                            |
| L89.624 | Pressure ulcer of left heel, stage 4                                            |
| L89.626 | Pressure-induced deep tissue damage of left heel                                |
| L89.810 | Pressure ulcer of head, unstageable                                             |
| L89.813 | Pressure ulcer of head, stage 3                                                 |
| L89.814 | Pressure ulcer of head, stage 4                                                 |
| L89.816 | Pressure-induced deep tissue damage of head                                     |
| L89.890 | Pressure ulcer of other site, unstageable                                       |
| L89.893 | Pressure ulcer of other site, stage 3                                           |
| L89.894 | Pressure ulcer of other site, stage 4                                           |

|  |         |                                                         |  |
|--|---------|---------------------------------------------------------|--|
|  | L89.896 | Pressure-induced deep tissue damage of other site       |  |
|  | L89.93  | Pressure ulcer of unspecified site, stage 3             |  |
|  | L89.94  | Pressure ulcer of unspecified site, stage 4             |  |
|  | L89.95  | Pressure ulcer of unspecified site, unstageable         |  |
|  | L89.96  | Pressure-induced deep tissue damage of unspecified site |  |

Abbreviations: ICD-10 = International Classification of Diseases, 10<sup>th</sup> Revision, *C. difficile* = *Clostridium difficile*,

CCSR = Clinical Classification Software Refined, UTI = Urinary Tract Infection

- a) Complications were only considered present if the record had a corresponding “N” value for the “Present on Admission” indicator.
- b) The complication was considered not present for records with an indication for exclusion of the complication.
- c) Denotes regular expression of ICD-10 code.

**Table S2.** Identification of Life Sustaining Therapies

| Life-Sustaining Therapies       | ICD-10 Code                | Description                                                                                                    |
|---------------------------------|----------------------------|----------------------------------------------------------------------------------------------------------------|
| Invasive Mechanical Ventilation | 5A1935Z                    | Respiratory Ventilation, Less than 24 Consecutive Hours                                                        |
|                                 | 5A1945Z                    | Respiratory Ventilation, 24-96 Consecutive Hours                                                               |
|                                 | 5A1955Z                    | Respiratory Ventilation, Greater than 96 Consecutive Hours                                                     |
|                                 | 0BH17EZ                    | Insertion of Endotracheal Airway into Trachea, Via Natural or Artificial Opening                               |
|                                 | 0BH18EZ                    | Insertion of Endotracheal Airway into Trachea, Via Natural or Artificial Opening Endoscopic                    |
| Tracheostomy                    | 0B110F4                    | Bypass Trachea to Cutaneous with Tracheostomy Device, Open Approach                                            |
|                                 | 0B113F4                    | Bypass Trachea to Cutaneous with Tracheostomy Device, Percutaneous Approach                                    |
|                                 | 0B114F4                    | Bypass Trachea to Cutaneous with Tracheostomy Device, Percutaneous Endoscopic Approach                         |
|                                 | 0BH13EZ                    | Insertion of Endotracheal Airway into Trachea, Percutaneous Approach                                           |
| Gastrostomy                     | 0D16074                    | Bypass Stomach to Cutaneous with Autologous Tissue Substitute, Open Approach                                   |
|                                 | 0D160J4                    | Bypass Stomach to Cutaneous with Synthetic Substitute, Open Approach                                           |
|                                 | 0D160K4                    | Bypass Stomach to Cutaneous with Nonautologous Tissue Substitute, Open Approach                                |
|                                 | 0D160Z4                    | Bypass Stomach to Cutaneous, Open Approach                                                                     |
|                                 | 0D163J4                    | Bypass Stomach to Cutaneous with Synthetic Substitute, Percutaneous Approach                                   |
|                                 | 0D16474                    | Bypass Stomach to Cutaneous with Autologous Tissue Substitute, Percutaneous Endoscopic Approach                |
|                                 | 0D164K4                    | Bypass Stomach to Cutaneous with Nonautologous Tissue Substitute, Percutaneous Endoscopic Approach             |
|                                 | 0D16874                    | Bypass Stomach to Cutaneous with Autologous Tissue Substitute, Via Natural or Artificial Opening Endoscopic    |
|                                 | 0D168J4                    | Bypass Stomach to Cutaneous with Synthetic Substitute, Via Natural or Artificial Opening Endoscopic            |
|                                 | 0D168K4                    | Bypass Stomach to Cutaneous with Nonautologous Tissue Substitute, Via Natural or Artificial Opening Endoscopic |
|                                 | 0D168Z4                    | Bypass Stomach to Cutaneous, Via Natural or Artificial Opening Endoscopic                                      |
|                                 | 0DH60UZ                    | Insertion of Feeding Device into Stomach, Open Approach                                                        |
|                                 | 0DH63UZ                    | Insertion of Feeding Device into Stomach, Percutaneous Approach                                                |
|                                 | 0DH64UZ                    | Insertion of Feeding Device into Stomach, Percutaneous Endoscopic Approach                                     |
|                                 | 0DH67UZ                    | Insertion of Feeding Device into Stomach, Via Natural or Artificial Opening                                    |
|                                 | 0DH68UZ                    | Insertion of Feeding Device into Stomach, Via Natural or Artificial Opening Endoscopic                         |
|                                 | 0DHA[03478]UZ <sup>a</sup> | Insertion of Feeding Device into Jejunum                                                                       |

Abbreviations: ICD-10 = International Classification of Diseases, 10<sup>th</sup> Revision

a) Denotes regular expression of ICD-10 code.
